# Supplementary material
Source: PubMed Central journal article supplement (PMC3193445)
Supplement: cr2010157x1.pdf [file cr2010157x1.pdf]

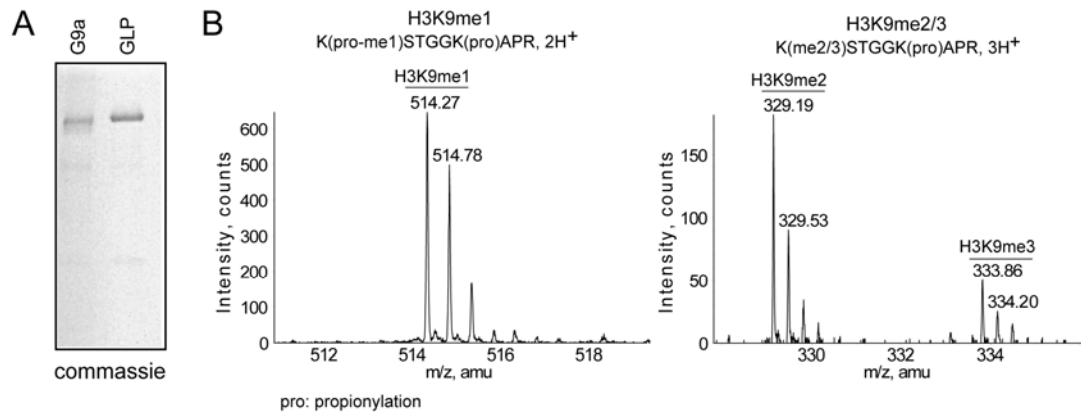

**Supplementary information, Figure S1** G9a's *in vitro* activity.

(A) SDS/PAGE for recombinant G9a and GLP. (B) Mass spectrometry analysis detects H3K9me1/2/3 products generated by G9a on nucleosome substrates.
