# Supplementary material
Source: PubMed Central journal article supplement (PMC3193445)
Supplement: cr2010157x2.pdf [file cr2010157x2.pdf]

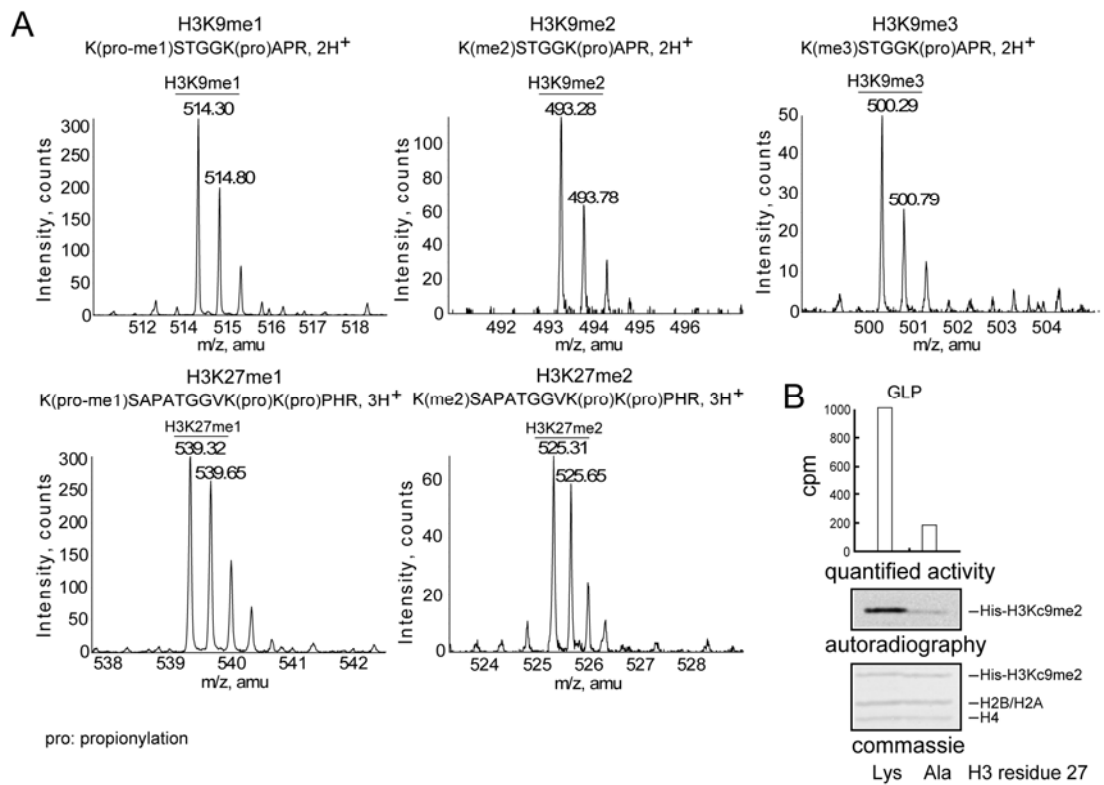

**Supplementary information, Figure S2** GLP's *in vitro* activity.

(A) Mass spectrometry analysis detects H3K9me1/2/3 and H3K27me1/2 products generated by GLP on nucleosome substrates. (B) GLP displays robust activity on nucleosome substrates containing H3Kc9me2, but not H3Kc9me2/K27A.
