# Supplementary material
Source: PubMed Central journal article supplement (PMC3193445)
Supplement: cr2010157x3.pdf [file cr2010157x3.pdf]

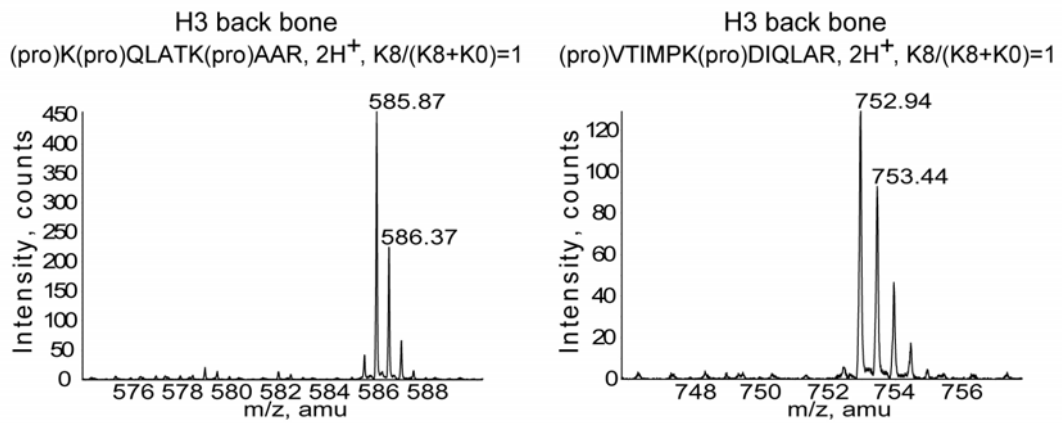

**Supplementary information, Figure S3** Full labeling of wild type ES cells with K8, determined by quantitative mass spectrometry.

Wild type ES cells are fully labeled with K8.
