# Supplementary material
Source: PubMed Central journal article supplement (PMC3193445)
Supplement: cr2010157x4.pdf [file cr2010157x4.pdf]

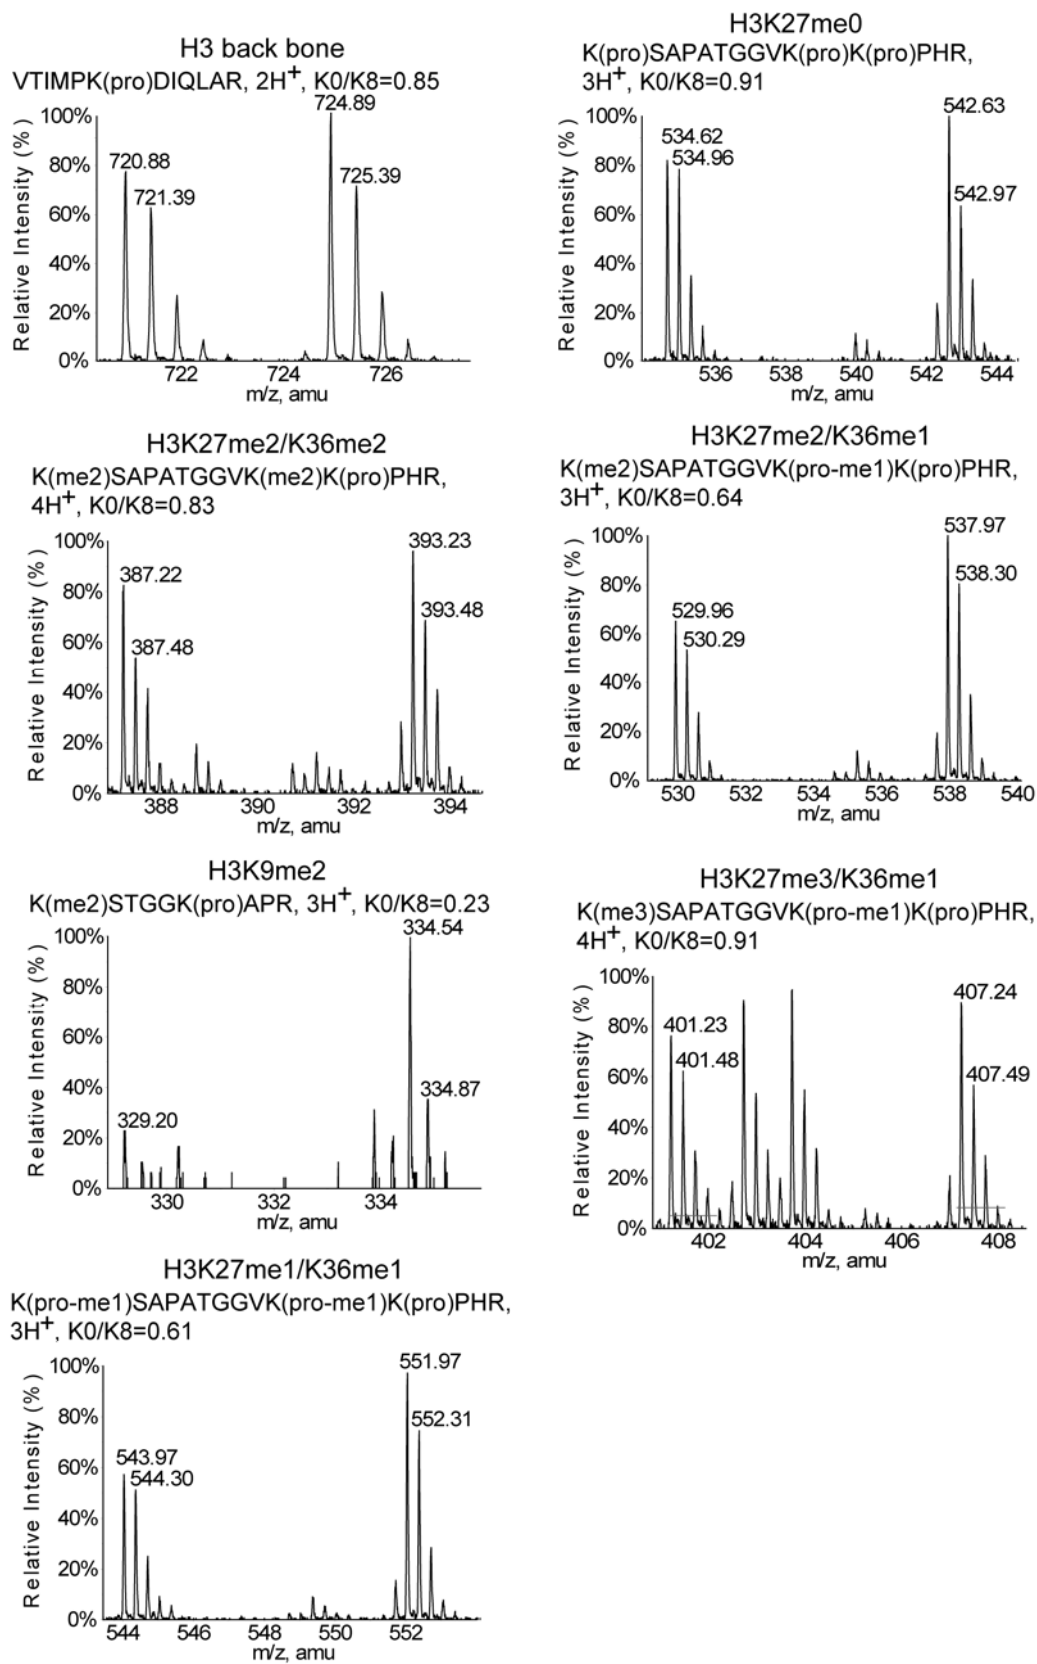

**Supplementary information, Figure S4** Mass spectra for peptides listed in Figure 1D.

G9a contributes to H3K27 methylation *in vivo*.
